# Supplementary material for: Plastid control of abaxial-adaxial patterning
Source: PubMed Central journal article supplement (PMC4629159; doi:10.1038/srep15975), 2015-11-02
Supplement: srep15975-s1.pdf [file srep15975-s1.pdf]

# **Plastid control of abaxial-adaxial patterning**

Eduardo Mateo-Bonmatí, Rubén Casanova-Sáez, Víctor Quesada, Andrea Hricová,  
Héctor Candela, and José Luis Micol

Instituto de Bioingeniería, Universidad Miguel Hernández, Campus de Elche, 03202  
Elche, Spain

**SUPPLEMENTARY DATA**

**Supplementary Table S1.** Mutations found in the *sca1-1* candidate interval.

| Mutation | Region affected                 | Predicted effect         |
|----------|---------------------------------|--------------------------|
| G→A      | At2g32990, 3 <sup>rd</sup> exon | Glu265→Glu (Synonymous)  |
| G→A      | At2g33060, 3'UTR                | -                        |
| C→T      | At2g33170, 2 <sup>nd</sup> exon | Ile1011→Ile (Synonymous) |
| C→T      | At2g33800, 2 <sup>nd</sup> exon | Leu233→Phe               |
| G→A      | At2g34670, 5'UTR                | -                        |

**Supplementary Table S2.** Primer sets used in this work.

| Purpose          | Oligonucleotide names | Oligonucleotide sequence (5' → 3')                   |                                                          |
|------------------|-----------------------|------------------------------------------------------|----------------------------------------------------------|
|                  |                       | Forward primer (F)                                   | Reverse primer (R)                                       |
| Linkage analysis | cer458065_F/R         | CTGATCTTTTCAACATACATTATAG                            | GTTATTATTTCCATACTTTTTGGC                                 |
|                  | cer450190_F/R         | GGAGGGTTAGTTTATAATTG                                 | GGTCGTTATTGTTAAATTATTG                                   |
|                  | cer460386_F/R         | TGGGTGCCACATAAAAAGGT                                 | TCCATCAACGTTATTTTTCTCAA                                  |
|                  | cer449091_F/R         | CCTCTTTCGTATAATTTGTG                                 | CATTACACTACATATTCTGAATAG                                 |
|                  | cer459006_F/R         | TGGTATGCTCATGTATCGCTTA                               | AGAGCTGATGAACAAAAGACTGA                                  |
|                  | cer459780_F/R         | CCAAAACAACAAAGGATTAGTGA                              | CCTTGCCTGAAAGAAAAGTGAA                                   |
| SCA1 sequencing  | At2g33800_F/R         | TGTTGCTTCCAAGCTGTTTCC                                | AAGTATTCTACTTTCCTCACAG                                   |
|                  | At2g33800_R2          |                                                      | CACAATCAATTAGAAGAATCGGTT                                 |
| Gateway cloning  | SCA1cids_F/R          | GGGGACAAGTTTGTACAAAAAGCAGGCT<br>ATGGCGACAGCATCAGCTCT | GGGGACCACTTTGTACAAGAAAGCTGG<br>GTATCATCCAAGTAGTAGTATGAGC |
| Genotyping       | Salk_095863_LP/RP     | AGCAGATTTCTGAACAGCAGC                                | AATTAACGTTGCTCGTTGGTG                                    |
|                  | LbB1.3_R              |                                                      | ATTTTGCCGATTTCCGAAC                                      |
|                  | pst_11131_LP/RP       | GGATGTGATGATTTGCTTGG                                 | GGCACAAGTCTTCGCATGTA                                     |
|                  | Ds5-1a_R              |                                                      | ACGGGATCCCGGTGAAACGGT                                    |
| qRT-PCR          | 18SrRNA_qPCR_F/R      | AGGATCCATTGGAGGGCAAGT                                | CGACGTTTTTAACTGCAACAAC                                   |
|                  | qSCA1_F/R             | TCAGGTATTGGTGGGAAGCC                                 | CCCTCTGATCTGTGAGGGAAAG                                   |
|                  | qACTIN2_F/R           | GCACCCTGTTCTTCTTACCG                                 | AACCCTCGTAGATTGGCACA                                     |
|                  | rbcL_F/R              | GTGTTGGGTTCAAAGCTGGT                                 | CATCGGTCCACACAGTTGTC                                     |
|                  | psbA_F/R              | GAGCAGCAATGAATGCGATA                                 | CCTATGGGGTCGCTTCTGTA                                     |
|                  | rrn16_F/R             | CGGTATCTGGGAATAAGCA                                  | GATTTGACGGCGGACTTAAA                                     |
|                  | rrn23_F/R             | GGGCGACTGTTTACCAAAAA                                 | TTACCCGACAAGGAATTTCCG                                    |
|                  | atpB_F/R              | GAGCTCGTATGAGAGTTGGT                                 | ACCCAATAAGGCGGATACCT                                     |
|                  | qKAN1_F/R             | GATCCAGCATTCAAATCAGG                                 | TTTCTCGTGCCAATCTGGTCT                                    |
|                  | qKAN2_F/R             | TTTGCATGGGAAGTTAATCG                                 | TTGTTCCCGAGATGCTTGAT                                     |
|                  | qARF3_F/R             | GGAAAGCCTGATATCCCTGTC                                | ACCATCCGAACAAGTGTTGA                                     |
|                  | qREV_F/R              | ATATTCGATGAATCGGGTCGTA                               | ATAACTCACATGTCTTCCCATCG                                  |

This list of oligonucleotides does not include those used for low-resolution mapping, which are described in Ponce *et al.*<sup>15</sup>.

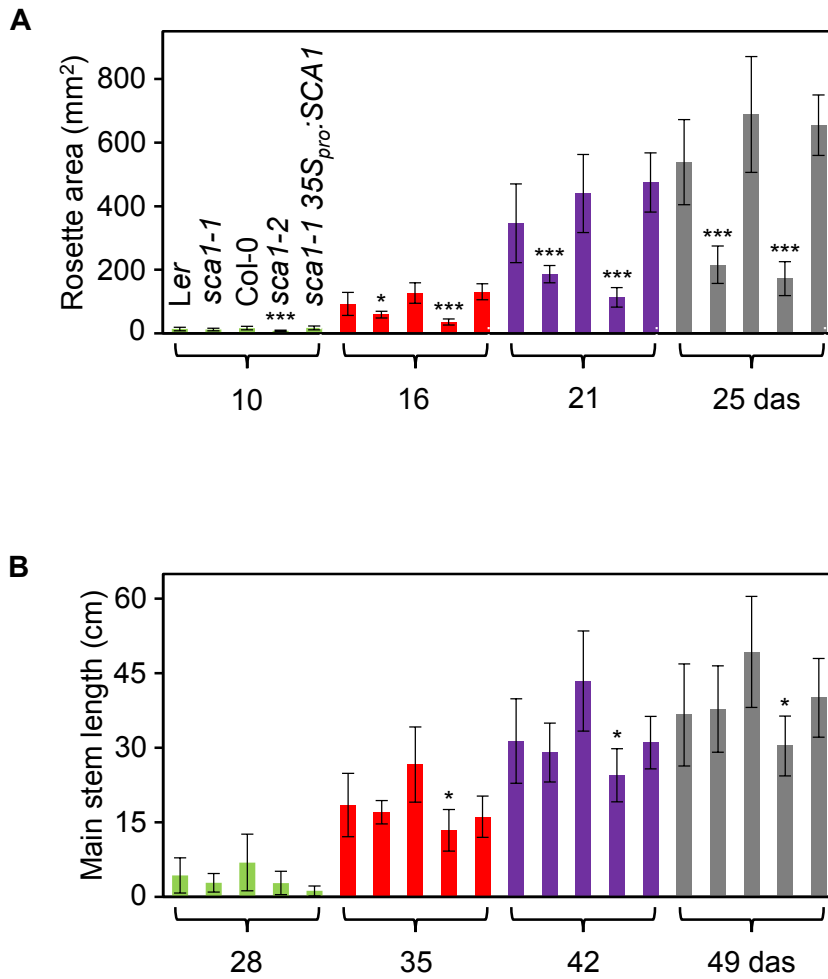

**Supplementary Figure S1.** Characterization of the growth of the *sca1* mutants. (A) Rosette area progression. (B) Main stem length progression. Asterisks indicate a significant difference with the corresponding wild type in a (A) Student's *t* test ( $n=16$ ) or (B) Mann-Whitney test ( $n=8$ ) (\* $p<0.05$ , \*\*\* $p<0.001$ ).

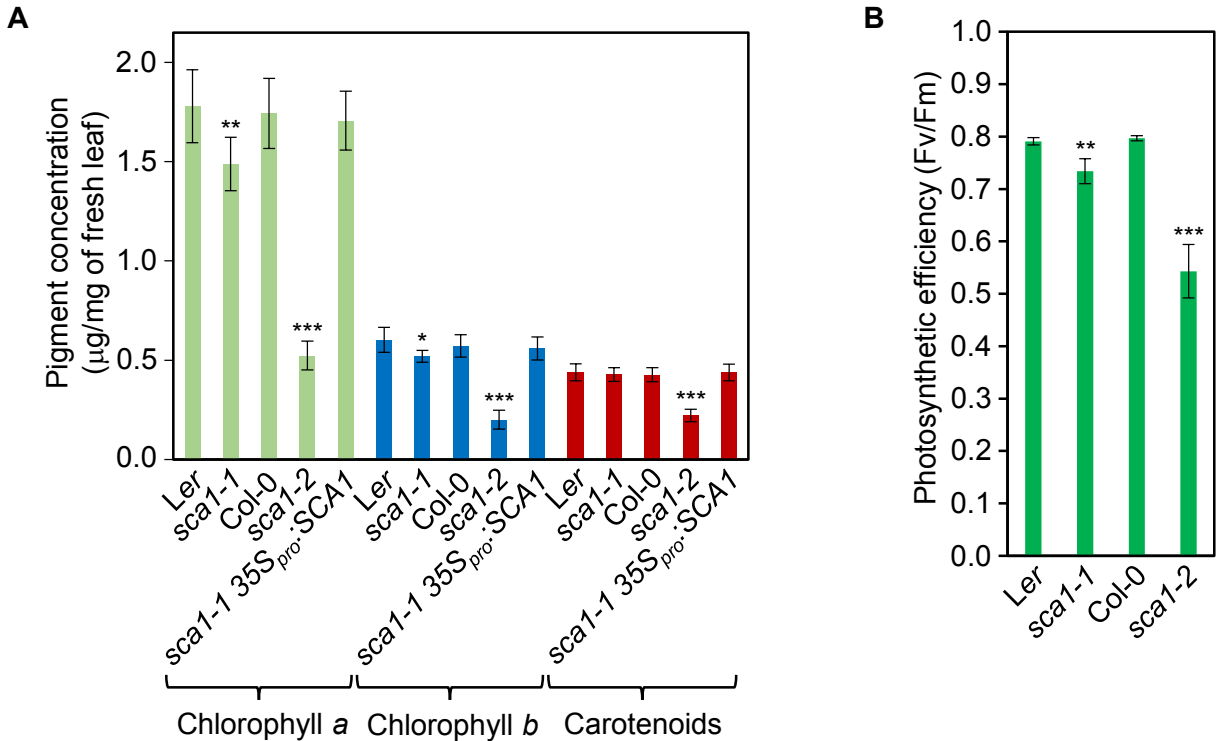

**Supplementary Figure S2.** Chlorophyll and carotenoid content and photosynthetic efficiency in the *sca1* mutants. (A) Chlorophyll and carotenoid concentration in plant leaves collected 14 das. (B) Maximum efficiencies of PSII measured as *Fv/Fm* in plant leaves at 20 das. Asterisks indicate a significant difference with the corresponding wild type in a Mann-Whitney test ( $n=8$ ) ( $*p<0.05$ ,  $**p<0.01$ ,  $***p<0.001$ ).

**A**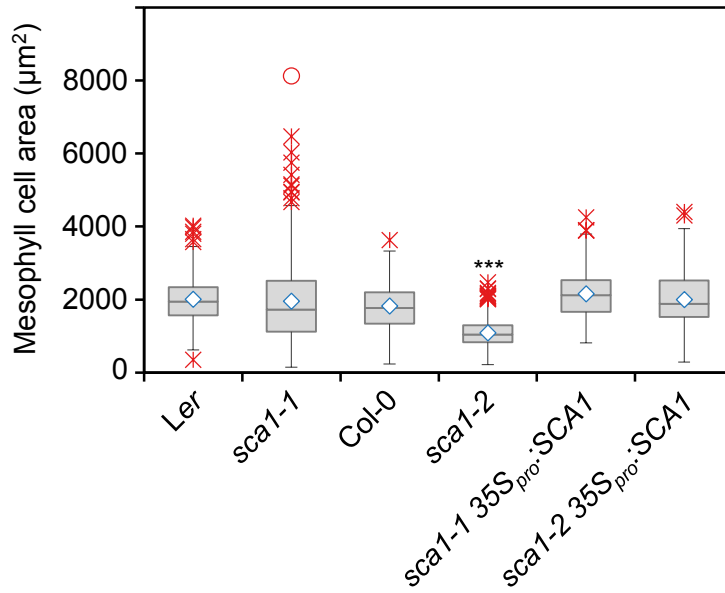**B**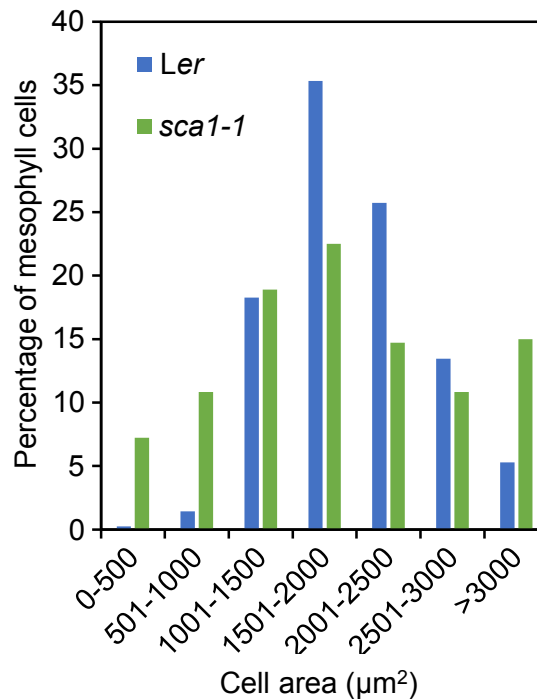

**Supplementary Figure S3.** Morphometric analysis of the palisade mesophyll cells of the *sca1* mutants. (A) Boxplot distribution of the palisade mesophyll cell area in first-node leaves from *Ler*, *sca1-1*, *Col-0*, *sca1-2*, *sca1-1 35S<sub>pro</sub>::SCA1* and *sca1-2 35S<sub>pro</sub>::SCA1*. Boxes are delimited by the first (Q1, lower hinge) and third (Q3, upper hinge) quartiles. Whiskers represent Q1 - 1.5 IQ (lower) and Q3 + 1.5 IQ (upper), where IQ = Q3 - Q1.  $\diamond$ : Mean. —: Median.  $\circ$ : Extreme maximum outlier ( $> [Q3 + 3 \cdot IQ]$ ).  $*$ : Maximum or minimum outlier. (B) Distribution of palisade mesophyll cell area in first-node leaves from *Ler* and *sca1-1*. More than 350 cells were analyzed from at least 10 different samples. Asterisks indicate a significant difference with the corresponding wild type in a Student's *t* test ( $***p < 0.001$ ).
